# Supplementary material for: NLG1, a novel mitochondrial membrane protein, control leaf and grain development in rice
Source: Research Square preprint supplement (doi:10.21203/rs.3.rs-2612655/v1), 2023-03-15
Supplement: Supplementary file 1 [file 268ea8a3af0a110eec8887e7.docx]

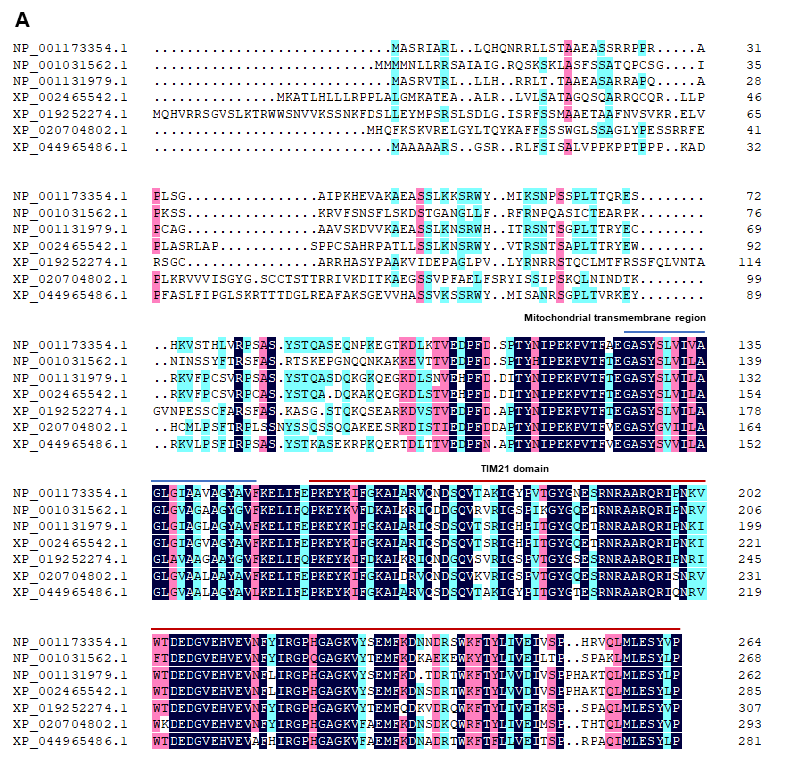


**Fig. S4.** Alignment of amino acid sequence NLG1. **A** Alignment of amino acid sequence of NLG1 with other 6 representative species in plants. Mitochondrial transmembrane region and TIM21 domain were indicated by blue line and red line, respectively. *Oryza sativa Japonica Group* [GenBank accession number: NP_001173354.1, NLG1], *Arabidopsis thaliana* [GenBank accession number: NP_001031562.1], *Zea mays* [GenBank accession number: NP_001131979.1], *Sorghum bicolor* [GenBank accession number: XP_002465542.1], *Nicotiana attenuata* [GenBank accession number: XP_019252274.1], *Dendrobium catenatum* [GenBank accession number: XP_020704802.1], *Hordeum vulgare subsp. Vulgare* [GenBank accession number: XP_044965486.1].
