# Supplementary material for: NLG1, a novel mitochondrial membrane protein, control leaf and grain development in rice
Source: Research Square preprint supplement (doi:10.21203/rs.3.rs-2612655/v1), 2023-03-15
Supplement: Supplementary file 2 [file 50529ac2008abb3b5c9210f2.xlsx]

## Sheet: Table S3
gene_id	Y321	Y322	Y323	nlg1	nlg2	nlg3	gene_name	gene_description
Os07g0424400	25.1579	93.3018	37.2058	7.02212	7.8167	8.80646	CELLULOSE SYNTHASE A3	Similar to Cellulose synthase-7	-
Os06g0230100	7.21657	9.77095	7.44628	1.45785	1.69593	0.45392	CELLULOSE SYNTHASE LIKE A3	Similar to Cellulose synthase-like A1	-
Os08g0160500	6.52124	6.86203	4.87059	0.328796	0.231233	0.0275625	CELLULOSE SYNTHASE LIKE F6	MLG (mixed-linkage glucan) synthase, Biosynthesis of MLG (cell wall polysaccharide	-
Os03g0770800	2.5393	2.28674	1.03665	0	0.101391	0.114813	CELLULOSE SYNTHASE LIKE C9	CSLC9	-
Os03g0837100	13.2671	11.8349	8.51844	0.890679	0.681674	0.562854	CELLULOSE SYNTHASE A5	Similar to Cellulose synthase-6	-
Os06g0335500	30.5649	31.6011	35.7844	19.1655	16.6144	16.9105	IAA21	AUX/IAA protein family protein	-
Os02g0723400	5.26265	5.02793	2.49238	0.677175	0.206419	0.140247	IAA8	Similar to Isoform 2 of Auxin-responsive protein IAA8	-
Os01g0190300	6.63593	17.9286	13.333	3.47575	4.22257	2.46322	IAA2	Similar to Auxin-responsive protein IAA26 (Indoleacetic acid-induced protein 26) (Phytochrome-associated protein 1)	-
Os07g0475700	2.23598	3.40202	1.0368	0	0	0	SMALL AUXIN-UP RNA 30	Auxin responsive SAUR protein family protein	Auxin_inducible
Os09g0554300	8.58854	10.4693	7.64035	1.56039	1.25782	1.22085	PIN likes 7a	Auxin efflux carrier domain containing protein	-
Os03g0175800	7.23001	8.45121	4.05419	1.40288	2.40015	1.60854	BIG GRAIN1	Positive regulator of auxin response and transport, Regulation of grain siz	-
Os02g0101000	16.1871	15.7107	15.4058	4.99949	6.10674	4.58016	amino acid transporter-like 11, OsAux/LAX1 protein	Amino acid transporter, transmembrane domain containing protein	Aa_trans
Os12g0609600	8.76701	7.62797	12.7138	0	0	0	SMALL AUXIN-UP RNA 57	Auxin responsive SAUR protein domain containing protein	-
Os07g0182400	18.8557	24.0964	14.6224	7.00716	4.32746	5.07352	IAA24	AUX/IAA protein family protein	-
Os04g0671900	16.0494	17.7275	16.3796	7.06719	7.25418	5.88738	AUXIN RESPONSE FACTOR 8	Transcription factor, Regulator for phosphate homeostasi	Auxin_resp
Os03g0175800	7.23001	8.45121	6.05419	1.40288	2.40015	1.60854	BIG GRAIN1	Positive regulator of auxin response and transport, Regulation of grain siz	-
Os12g0609600	8.76701	7.62797	12.7138	0	0	0	SMALL AUXIN-UP RNA 57	Auxin responsive SAUR protein domain containing protein	-
Os01g0951100	1.92108	1.64934	1.74463	0	0.0731298	0	-	Arf GTPase activating protein family protein	C2
Os04g0117100	102.769	75.0353	131.725	22.1218	29.7597	27.3741	mitochondrial proton-transporting ATP synthase 1	ATPase, F0 complex, subunit E, mitochondrial domain containing protein	-
Os11g0312220	8.78006	5.00222	5.43223	0.481827	0.665821	0.439811	ADK-B	Adenylate kinase B (EC 2.7.4.3) (ATP-AMP transphosphorylase)
Os08g0250200	40.5255	30.2048	41.2787	18.3879	11.1084	13.613	-	ATPase, F1 complex, epsilon subunit, mitochondrial family protein	-
Os02g0718900	123.703	105.623	141.996	65.8522	64.1671	68.4096	ADENOSINE NUCLEOTIDE TRANSLOCATOR	ADP,ATP carrier protein, mitochondrial precursor (ADP/ATP translocase) (Adenine nucleotide translocator) (ANT)	Mito_carr
Os03g0305600	1.45207	1.30991	2.11085	4.0828	2.04746	2.62763	-	Mitochondrial import inner membrane translocase, subunit Tim17/22 family protein	-
Os11g0549650	1.96661	1.8388	1.77241	2.63441	2.5407	4.50879	-	Mitochondrial matrix Mmp37 domain containing protein	-
Os01g0978100	176.049	175.806	202.603	97.9351	87.9885	72.1294	-	Similar to Cysteine synthase, mitochondrial precursor (EC 2.5.1.47	PALP
Os01g0843300	0.0417451	0.0708023	0.42796	3.24106	2.44864	3.19938	-	Similar to Mitochondrial Rho GTPase	-
Os02g0672500	0	0.0311941	0.18855	1.1477	1.35544	1.6915	-	Similar to Mitochondrial import inner membrane translocase subunit tim23	-
Os03g0415500	0.0730739	0	0.107019	0.848361	1.42877	1.05786	-	Mitochondrial import inner membrane translocase, subunit Tim17/22 family protein	-
Os02g0131600	5.71289	5.40939	5.09593	19.8954	18.802	19.0646	-	Similar to Mitochondrial import receptor subunit TOM22 homolog (Translocase of outer membrane 22 kDa subunit homolog) (TOM9)	-
Os05g0424000	1.1988	0.39353	1.89727	5.24716	5.03102	6.35564	amino acid permease 11F, amino acid permease 7, amino acid/auxin permease 7	Amino acid permease, Transport of amino acid	Aa_trans
