# Supplementary material for: NLG1, a novel mitochondrial membrane protein, control leaf and grain development in rice
Source: Research Square preprint supplement (doi:10.21203/rs.3.rs-2612655/v1), 2023-03-15
Supplement: Supplementary file 3 [file 56630ca0e22d9f07892d9b67.docx]

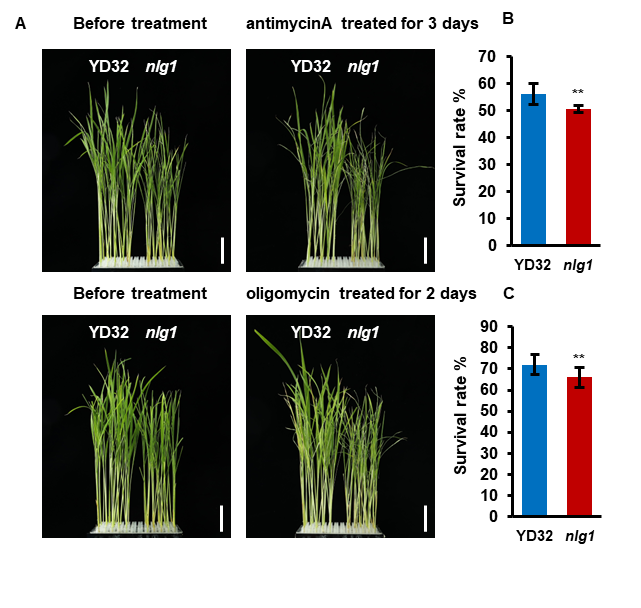


**Fig. S5.** Treatment with mitochondrial electron transport inhibitors. **A** Phenotypes of the YD32 and *nlg1* mutant after treatment with 1 μM antimycin A and 0.2 μM oligomycin for 3 days. **B-C** The survival rate of the YD32 and *nlg1* mutant after treatment with 1 μM antimycin A and 0.2 μM oligomycin, respectively. Data represent means ± SD (n = 6). **Significant difference at p < 0.01 compared with YD32 by Student’s t-test. Scale bars: 5cm in A.
