# Supplementary material for: NLG1, a novel mitochondrial membrane protein, control leaf and grain development in rice
Source: Research Square preprint supplement (doi:10.21203/rs.3.rs-2612655/v1), 2023-03-15
Supplement: Supplementary file 4 [file 692c4b2871c0819ffec41f41.docx]

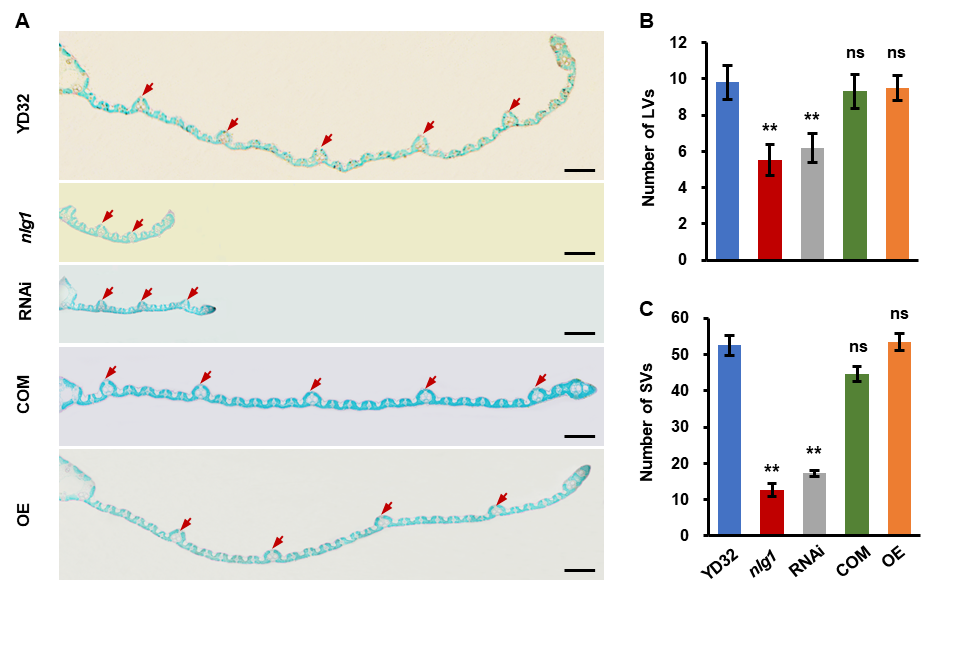


**Fig. S3.** Histological analysis of the flag leaf of YD32 and *nlg1*, RNAi, COM and OE transgenic lines. **A** Parrafin transverse section of the flag leaf of YD32, *nlg1*, RNAi, COM and OE. Red arrows point out the large vascular bundles (LVs). **B-C** Comparisons of the number of the large vascular bundles (LVs) B the small vascular bundles (SVs) C. Data represent means ± SD (n = 10). **Significant difference at p < 0.01 compared with YD32 by Student’s t-test, and ns means no significance. Scale bars: 500μm in A.
