# Supplementary material for: NLG1, a novel mitochondrial membrane protein, control leaf and grain development in rice
Source: Research Square preprint supplement (doi:10.21203/rs.3.rs-2612655/v1), 2023-03-15
Supplement: Supplementary file 5 [file 9a2640879bbf34f36299e959.xlsx]

## Sheet: Tables S2
Name	Sequence
Gene mapping
M34-F	CAGCTGAGAAGCCATCC
M34-R	CACATGACAGCCAGTCGG
M35-F	TGGCCGTTGAGGCGATTAG
M35-R	CAGAGTCTTACTGCTAACCCCGT
M36-F	TCCTGTGTTCGCCTGCTCGTC
M36-R	TTCGTGGTCGCTGAAAAGTCC
M37-F	GCGCGATAAACGTTTGAGAGAAGG
M37-R	AAATCAGTCGCGGTTGCTGTCC
L8-F	GTGTTTCACGTTGCGTACGTGCG
L8-R	CGTTCACCGATCTGCTCTCCTCG
L46-F	GTTGCGTTGAAATGTTGCTATG
L46-R	GTACTCCCTCCTCATATTACAGAC
L53-F	GACACGAGGTAGGCATGAGAC
L53-R	CACGAGAAGAAATGATGCAAAC
L62-F	TCTAAACGTGACTGAAAGGAGGC
L62-R	TGACTCATCTTCTATTAGTGG
L56-F	GGCTCGGCCAACCAATTGGGC
L56-R	CGCACGATGGATCCGGCTCAC
L24-F	GTAGTCCTGGTTGTATCCGAG
L24-R	ACTACCAATCGAGACCTGGTCTC
L57-F	GATTCAAGGGGTAGGTAGGTTG
L57-R	CTTCCTTTCTCTCCTAGGTCCAC
L41-F	ATGTCACATCCTAAGTTGAG
L41-R	TTATTTAATTATATCGTAATGCCT
L35-F	CAGGCCAAGTGCAGCATCGATC
L35-R	GCACCGTTTAGTTGTTTA
L39-F	GAGTTCGTATGGGTTACTTA
L39-R	GCCTCGGTTCGTGCTGCATG
14890-1F	ATATAAGGCATACATGCATAC
14890-1R	CACAGCAATGTTCTGCAACTA
14890-2F	GCGCAGCCCCTACCATCACTG
14890-2R	GTTACAACCTCCCCGGTTGCC
14890-3F	ATGGCGTCCCGGATCGCGAGG
14890-3R	GAGTAAATAGCATACTATCAT
14890-4F	CATAGTATGACAGAGAGTTGC
14890-4R	CTCCAGCAATACGTTGCCAACTG
14890-5F	CAATCTAAGCTGGGAGGCTGC
14890-5R	GCTAAGTGACTTGCATAGGATC
14890-6F	TATGACCCTCACATGTAGCCAC
14890-6R	GTGCACATACGTCAACTGTATG
14890-7F	CATGGACACATGCTCCTTGAC
14890-7R	TAAGTAAAAGAATTATGAAAGGTTATCG
14890-8F	TATTAGTGAGAATGGACCA
14890-8R	GCTGGAGGCTGTATCAGGTG
Vector construction
NLG1-OE-F	CTTCTGCAGGAGCTCGATGGCGTCCCGGATCGCG
NLG1-OE-R	TGCTCACCATGGATCCTGCTGGTACGTAAGATTC
NLG1-1305GUS-F	GCAGGCATGCAAGCTTATCCAAACTATGAGGTGA
NLG1-1305GUS-R	CTCAGATCTACCATGGTGAGGGGGGGAGTCTCTC
NLG1-COM1-F	TCGACCTGCAGGCATGCAATCCAAACTATGAGGTGA
NLG1-COM1-R	CGACGGCCAGTGCCAAGCTTACAAGATTCACTAATGTCT
NLG1-COM2-F	AGACATTAGTGAATCTTGTGTTGTTGGCTTCTCTAAC
NLG1-COM2-R	CGACGGCCAGTGCCAAGCTTAAGTAAAAGAATTATGA
NLG1-RNAi-1F	cgatcggggaaattcgagTCAAACCCTTCAAGTCCTC
NLG1-RNAi-1R	gattttcagatcgatactCTTGTACTCTTTTGGTTC
NLG1-RNAi-2F	tctgtcgacctcgagggtCTTGTACTCTTTTGGTTC
NLG1-RNAi-2R	caggtcgactctagaggaTCAAACCCTTCAAGTCCT
qRT-PCR
TIM17-RT-F	5' GCTGCTGGTGGTGACCGCAAGT 3'
TIM17-RT-R	5' TCCCTGTAGTCGAAGGATGGAA 3'
TOM22-RT-F	5' GGCGAGCAGGGCGAAGAAGGTG 3'
TOM22-RT-R	5' CGATGATGAGCGGGACGACGAG 3'
TOM40-RT-F	GTGACAATCCTTGTGCGCC
TOM40-RT-R	GAACTCGTAGTTGGAGGTGG
VDAC1-RT-F	5' TTCCAAGAGTACAACACCTGTC 3'
VDAC1-RT-R	5' GGCTCGGATGAAGAGTATTTAG 3'
AOX1a-RT-F	TGCGGCTGATGTCCACGTC
AOX1a-RT-R	GTTGACCACCACCTCCTTC
COX11-RT-F	5' GAGGAGCAAACACTTCTTCCAG 3'
COX11-RT-R	5' TTCCATTTTGGGGTCTGTCTCA 3'
UCP1-RT-F	TTTGGAACGGCATCATCCC
UCP1-RT-R	GCTCCAATACCTTCCTGTC
YUCCA1-RT-F	CGCAACACGGTGCATGTC
YUCCA1-RT-R	CGATGCCGAACGTGGATAG
TAR1-RT-F	GAGGTGCGCCGCCTCCA
TAR1-RT-R	GAGCGCGGCCTGGAAGAG
ARF1-RT-F	GCACTCCTTCTGCAAGATCC
ARF1-RT-R	GGCCCCTGTAGATGTGCTTA
ARF3-RT-F	TCTCGTCCCTCTACGTGCTT
ARF3-RT-R	CCGATTACAACGGGAGCTTA
ARF6-RT-F	CAAGAGTTGATGGCGAAAGACC
ARF6-RT-R	CAACCCGTAGTCAGAAGATGCC
ARF7-RT-F	CTTGACCAGCATCTGCCTTTGT
ARF7-RT-R	ATCTGAATCGGTTTCAGCCCTA
ARF8-RT-F	AGATGAGCCTTAGCGGCACCAC
ARF8-RT-R	CCGAGCCCTCCGAGGCACCTTT
ARF9-RT-F	ATGGCCGCCGCGATGGAGATGGCGG
ARF9-RT-R	CCGCCATCTCCATCGCGGCGGCCAT
ARF10-RT-F	GCAGCCGAATCTGATGCTCTAC
ARF10-RT-R	TCGGTGCTGATGATGATTCTCG
ARF12-RT-F	CTTGGGAGTCCTTTGTGAATAG
ARF12-RT-R	GACAGATACCGTGGATCATTTC
AUX1-RT-F	TCGCCCACATCCTCACCTACCG
AUX1-RT-R	GAGCACGAACATCCCCGTCCAG
AUX3-RT-F	CAGGTGTTCTACGGCCTCATGG
AUX3-RT-R	CTGACGCCTTCCTTCTCCTTGC
PIN3-RT-F	TTGTTCAGGCGGCTCTACCA
PIN3-RT-R	AAGGAAATTGCTTACGCTGT
PIN5a-RT-F	ACCTGGGCCTGCCTCGCCAATA
PIN5a-RT-R	GCCATTCCTGTGCCTGACTTGG
PIN5b-RT-F	GGTCGGTGAGGTGGTGGAGGTT
PIN5b-RT-R	AGGTGAAGAAGGGCATGGAGAA
PIN5c-RT-F	CCTCAATCCATCACGACGTTCG
PIN5c-RT-R	TAATGACGCCAGTGTCCCGAAT
TAD1-RT-F	GTAACTGGCGCTGGTGATGAAA
TAD1-RT-R	CCCCGATGCTACTTAGGCTGTC
APC6-RT-F	GGCATACGAAGCACTGGACAAC
APC6-RT-R	TTCAAGGGCCTCATAGCACAAA
NAL1-RT-F	CCCTGGTCGGTTGCCCAAAGGT
NAL1-RT-R	TGCGGAATCCCACTGCTGTCCC
NAL2-RT-F	GGTCGAGTCGCTAGGAGGGAG
NAL2-RT-R	CTACCTCTCTCCCAATTCTCTC
NAL3-RT-F	GCCGCATCGAGGGCAAGAACGT
NAL3-RT-R	GTGGAGGAGGGCGGTGAGGGTT
NAL7-RT-F	GGTGAGTTGTTCACGGAGGAGG
NAL7-RT-R	CGGAGAATCCCACGCAGTAGAG
GW5-RT-F	CACTCGTCGCCGCTCAACTGCC
GW5-RT-R	TCTGCGAACGCACCTTCGCCTC
GW7-RT-F	GCTGCCAAAAGATGAGTCTCCG
GW7-RT-R	CAATCTTCTCCTGCTGCCTCCA
GW8-RT-F	TTCTGCCAGCAGTGCAGCAGGTT
GW8-RT-R	GGCGACGGTTGTGCCCATCTAG
