# Supplementary material for: NLG1, a novel mitochondrial membrane protein, control leaf and grain development in rice
Source: Research Square preprint supplement (doi:10.21203/rs.3.rs-2612655/v1), 2023-03-15
Supplement: Supplementary file 8 [file bb4f424bd459a4cd79ac3611.docx]

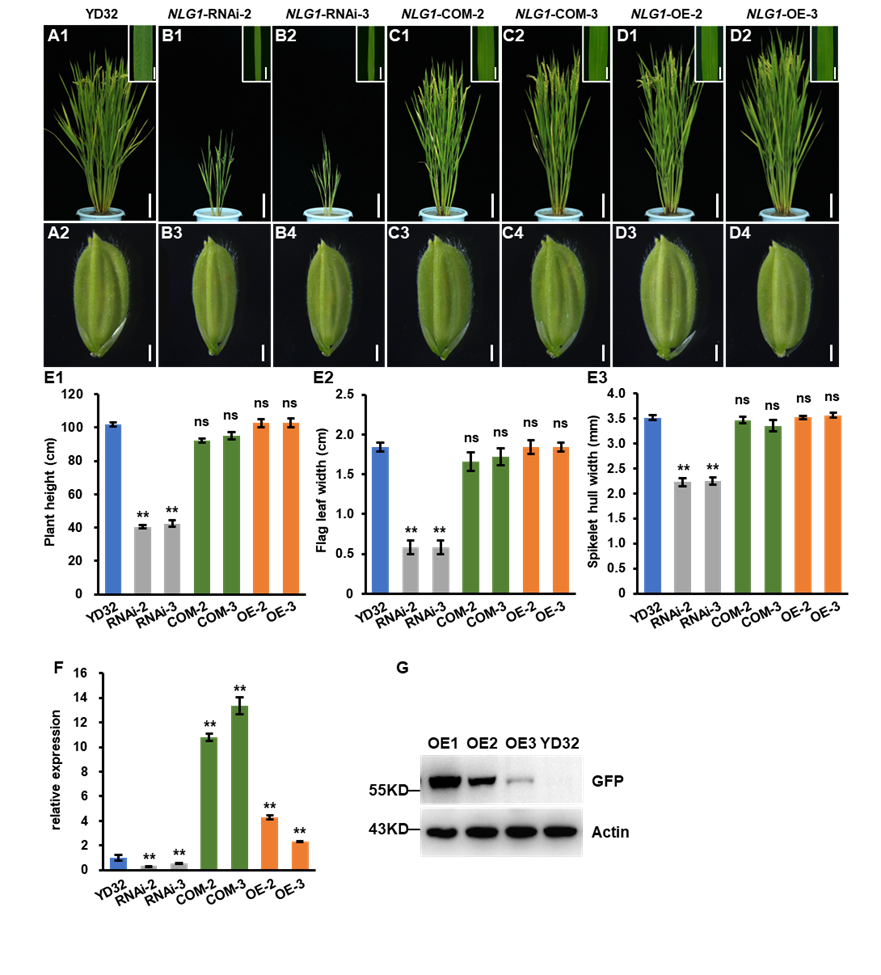


**Fig. S2.** Morphological comparison among YD32, RNAi, COM and OE transgenic lines at heading stage. **A-D** Morphological comparison of plant architecture, flag leaf and spikelet of YD32 (A1-A2), RNAi (*NLG1*-RNA interference) (B1-B4), COM (*NLG1*-complementation) (C1-C4), OE (*NLG1*-overexpression) (D1-D4). **E1-E2** Plant height (E1), flag leaf width (E2) and spikelet hull width (E3) of YD32, RNAi, COM and OE lines. Data represent means ± SD (n = 5). **F** Expression analysis of NLG1 in the flag leaves of the YD32, RNAi, COM and OE lines using RT-qPCR. Data represent means ± SD (n = 3). **G** Immunoblot showing the quantities of NLG1-GFP fusion protein in flag leaves from three independent OE lines. Actin showing approximately equal loading of total proteins. **Significant difference at p < 0.01 compared with YD32 by Student’s t-test, and ns means no significance. Scale bars: 10cm in A1, B1, B2, C1, C2, D1, D2; 1mm in flag leaf, 1mm in A2, B3, B4, C3, C4, D3, D4.
