# Supplementary material for: NLG1, a novel mitochondrial membrane protein, control leaf and grain development in rice
Source: Research Square preprint supplement (doi:10.21203/rs.3.rs-2612655/v1), 2023-03-15
Supplement: Supplementary file 9 [file e40717a212a8447cc0f143d7.xlsx]

## Sheet: Table S1
Gene	Annotation
LOC_Os03g14840	AGC_PVPK_like_kin82y.8 - ACG kinases include homologs to PKA, PKG and PKC, expressed
LOC_Os03g14850	OsMADS72 - MADS-box family gene with M-alpha type-box, expressed
LOC_Os03g14860	G-patch domain containing protein, expressed
LOC_Os03g14880	expressed protein
LOC_Os03g14890	AGAP008572-PA, putative, expressed；Mitochondrial import inner membrane translocase, subunit Tim21 domain containing protein
LOC_Os03g14900	NB-ARC/LRR disease resistance protein, putative, expressed
